# Supplementary material
Source: Preprints.org preprint supplement (doi:10.20944/preprints201905.0123.v2)
Supplement: Supplementary file 1 [file supplementary]

## Sheet: Sheet1
			Testing the Hypothesis that the Nylonase NylB Protein
			Arose de novo via a Frameshift Mutation
			Salvador Cordova and John Sanford
			Supplementary Table S8
			Screen captures of MUSCLE 6.0 alignment of 6 NylB and 4 NylB' proteins.
			Proteins 1-8 have experimental support for nylonase activity.
			Protein 9 (Paenibacillus sp AD87) had the lowest e-value in psi-Blast search for NylB in Flavobacterium KI72
			Protein 10 (E. Coli) is from a well known organism
			Highlighted columns have 80% or higher conservation across selected proteins.
			Asterisks “*” above a column indicate 100% conservation
			Distance Matrix at the bottom
	Positions 1-51
	Positions 52-131
	Positions 132-212
	Positions 213-293
	Positions 294-374
	Positions 375-455
MUSCLE Parameters:
Gap Open -2.9, Gap Extend 0, Hydrophobicity Multiplier 1.2, Max Memory in MB 487, Max Iterations, 8,
Clustering Method (Iteration 1,2) UPGMB, Clustering Method (Other Iterations) UPGMB, Min Diag Length (lambda).
MUSCLE Citation: Edgar, Robert C. (2004), MUSCLE: multiple sequence
alignment with high accuracy and hight throughput, Nucleic Acids Research 32(5), 1792-1797.
Table. Estimates of Evolutionary Divergence between Sequences
The number of amino acid differences per sequence from between sequences are shown. The analysis involved 10 amino acid sequences.
All positions with less than 95% site coverage were eliminated. That is, fewer than 5% alignment gaps, missing data, and ambiguous bases
were allowed at any position. There were a total of 277 positions in the final dataset. Evolutionary analyses were conducted in MEGA6 [1].
1. Tamura K., Stecher G., Peterson D., Filipski A., and Kumar S. (2013). MEGA6: Molecular Evolutionary Genetics Analysis version 6.0.
Molecular Biology and Evolution30: 2725-2729.
