# Supplementary material
Source: Preprints.org preprint supplement (doi:10.20944/preprints201905.0123.v2)
Supplement: Supplementary file 2 [file supplementary_table_s1.xlsx]

## Sheet: nylb_pssm
	Testing the Hypothesis that the Nylonase NylB Protein
	Arose de novo via a Frameshift Mutation
	Salvador Cordova and John Sanford
	Supplementary Table S1
	List of organisms with NylB from uniprot, and conserved domains of NylBs
	with sample screen captures from NIH CDD and UniProt websites at the bottom
NOTES:
COG1680 = CubicO group peptidase, beta-lactamase class C family [Defense mechanisms];
pfam00144 = Beta-lactamase; This family appears to be distantly related to pfam00905 and PF00768 ...
n/a = not applicable because the data was embargoed pending publication
	no. avail. cdds	173		Average
	count nylbs	201		134.656
					Secondary	Secondary
		Conserved	Primary	Primary	Conserved	Conserved
UNIPROT	Genbank	Domain Data	Conserved Domain	Conserved Domain	Domain	Domain
ID	ID	Available	ACCESSION ID	Bit score	ACCESSION ID	Bit score	ORGANISM
A0A1F2PJC9	OFV71450.1	1	COG1680	153.61			Acetobacterium wieringae
A0A0M7D8K9	CUI49959.1	1	COG1680	154			Achromobacter sp.
A0A1G5IJL5	SCY75618.1	1	COG1680	175.18			Acinetobacter baumannii
A0A1V5IP05	removed	0	n/a				Actinobacteria bacterium ADurb.BinA094
Q14TA0	BAE97621.1	1	COG1680	129.73			Agromyces sp. KY5R
A0A164DTT4	KZE94724.1	1	COG1680	129.73			Agromyces sp. NDB4Y10
A0A061QAK6	GAK32671.1	1	COG1680	116.63			alpha proteobacterium Q-1
A0A1V6FWC3	removed	0	n/a				Alphaproteobacteria bacterium ADurb.Bin100
A0A1V5FSP3	removed	0	n/a				Alphaproteobacteria bacterium ADurb.BinA280
A0A0F7KSK3	AKH43388.1	1	COG1680	144.37			Altererythrobacter atlanticus
A0A1B2A9T7	ANY18919.1	1	COG1680	146.68			Altererythrobacter dongtanensis
A0A1C7D5F0	ANU06694.1	1	COG1680	137.43			Altererythrobacter namhicola
A0A0N0XJM8	KPC53432.1	1	COG1680	140.9			Amantichitinum ursilacus
A0A178X0M9	OAP24026.1	1	COG1680	114.71			Amycolatopsis sp. M39
A0A1S1V4U0	OHW61706.1	1	COG1680	138.59			Andreesenia angusta
A0A1B5ZRZ2	GAU57986.1	1	COG1680	143.98			Arenibacter sp. C-21
J7LU22	AFR30965.1	1	COG1680	128.57			Arthrobacter sp. Rue61a
A0A0F7RGC6	BAR75977.1	1	COG1680	137.43			Bacillus anthracis
A0A1Y6B3E8	PDR93506.1	1	COG1680	115.48			Bacillus cereus
A0A0A0WQB8	AIW84412.1	1	COG1680	132.43			Bacillus mycoides
A0A0K6MLC5	CUB53012.1	1	COG1680	136.28			Bacillus subtilis
A0A1B1L838	ANS48888.1	1	COG1680	133.97			Bacillus thuringiensis
A0A1C9BVS0	AOM11896.1	1	COG1680	136.66			Bacillus thuringiensis Bt18247
A0A1V5K7C0	removed	0	n/a				bacterium ADurb.Bin478
A0A0A1P7J7	CEJ11575.1	1	COG1680	154.38			bacterium YEK0313
A0A180EZ91	OAV65418.1	1	COG1680	135.51			Bacteroidales bacterium Barb4
A0A120A2Y7	KWR55989.1	1	COG1680	141.67			Bacteroides stercoris
A0A174H7V0	CUO69517.1	1	COG1680	150.92			Bacteroides uniformis
A0A1V6JEF7	removed	0	n/a				Bacteroidetes bacterium ADurb.Bin008
A0A1V6IDS0	removed	0	n/a				Bacteroidetes bacterium ADurb.Bin035
A0A1V6HGC1	removed	0	n/a				Bacteroidetes bacterium ADurb.Bin041
A0A1V6CTM4	removed	0	n/a				Bacteroidetes bacterium ADurb.Bin123
A0A1V6BDD1	removed	0	n/a				Bacteroidetes bacterium ADurb.Bin141
A0A1V6B290	removed	0	n/a				Bacteroidetes bacterium ADurb.Bin145
A0A1V5JE97	removed	0	n/a				Bacteroidetes bacterium ADurb.BinA012
A0A1V5H839	removed	0	n/a				Bacteroidetes bacterium ADurb.BinA174
A0A1V5QXL4	removed	0	n/a				Betaproteobacteria bacterium ADurb.Bin341
A0A173YDV8	CUN61720.1	1	COG1680	149.38			Blautia obeum
A0A173WUL9	CUN43212.1	1	COG1680	149.76			Blautia wexlerae
G2ZV67	CCA82966.1	1	COG1680	169.79			blood disease bacterium R229
A0A023XFH2	AHY51187.1	1	COG1680	166.71			Bradyrhizobium japonicum SEMIA 5079
A0A095F1I8	KGC11198.1	1	COG1680	149.38			Burkholderia gladioli (Pseudomonas marginata) (Phytomonas marginata)
A0A221AGB0	ASL47600.1	1	COG1680	119.71			Burkholderia sp. AD24
A0A011PTN3	EXI80185.1	1	COG1680	151.3			Candidatus Accumulibacter sp. BA-92
A0A084Y3U9	KFB69393.1	1	COG1680	63.48	cl05973	36.69	Candidatus Accumulibacter sp. SK-01
A0A080MKD1	KFB77834.1	1	COG1680	60.39			Candidatus Accumulibacter sp. SK-02
A0A1V6B2J0	removed	0	n/a				Candidatus Aminicenantes bacterium ADurb.Bin147
A0A1V6EEM6	removed	0	n/a				Candidatus Hydrogenedentes bacterium ADurb.Bin101
A0A1Q9P628	OLS29815.1	1	COG1680	130.89			Candidatus Thorarchaeota archaeon AB_25
A0A174HD35	CUO70815.1	1	COG1680	150.92			Catenibacterium mitsuokai
K1LUT6	EKB47909.1	1	COG1680	125.88			Cecembia lonarensis LW9
A0A1X6W3T6	SHE12636.1	1	COG1680	123.57			Chlamydia abortus (Chlamydophila abortus)
A0A1V5WGQ7	removed	0	n/a				Chloroflexi bacterium ADurb.Bin222
A0A1V5RV19	removed	0	n/a				Chloroflexi bacterium ADurb.Bin325
A0A1A7KL28	OBW42568.1	1	COG1680	124.72			Chryseobacterium sp. MOF25P
A0A239XLG5	SNV47565.1	1	COG1680	122.03			Chryseobacterium taklimakanense
A0A174Z2S0	CUQ80252.1	1	COG1680	116.25			Clostridium innocuum
A0A1S8TH57	OOM77137.1	1	COG1680	85.43			Clostridium puniceum
A0A1A6B1J1	OBR96138.1	1	COG1680	115.09			Clostridium ragsdalei P11
A0A0U5HF17	CUX46217.1	1	COG1680	130.5			Clostridium sp. C105KSO15
A0A0F0CE38	KJJ70112.1	1	COG1680	128.57			Clostridium sp. FS41
A0A174DWD8	CUO29517.1	1	COG1680	122.41			Coprococcus comes
H8MKX6	AFE09676.1	1	COG1680	122.8			Corallococcus coralloides (strain ATCC 25202 / DSM 2259 / NBRC 100086 / M2) (Myxococcus coralloides)
Q1LCI4	ABF12142.1	1	COG1680	106.23			Cupriavidus metallidurans (strain ATCC 43123 / DSM 2839 / NBRC 102507 / CH34) (Ralstonia metallidurans)
F8GSN1	AEI79800.1	1	pfam00144	107.59			Cupriavidus necator (strain ATCC 43291 / DSM 13513 / N-1) (Ralstonia eutropha)
B3RAT4	CAQ72009.1	1	COG1680	177.11			Cupriavidus taiwanensis (strain DSM 17343 / BCRC 17206 / CIP 107171 / LMG 19424 / R1) (Ralstonia taiwanensis (strain LMG 19424))
A0A1Y0N366	ARV17122.1	1	COG1680	167.86			Curvibacter sp. AEP1-3
A0A210W8E3	OWG18506.1	1	COG1680	160.55			Delftia sp. K82
A0A1V6GPD1	removed	0	n/a				Deltaproteobacteria bacterium ADurb.Bin072
A0A1V6AWN4	removed	0	n/a				Deltaproteobacteria bacterium ADurb.Bin151
A0A1V5J9N3	removed	0	n/a				Deltaproteobacteria bacterium ADurb.BinA014
A0A1E3AQH9	ODM10959.1	1	COG1680	138.97			Eisenbergiella tayi
A0A1X7AI28	SMA42681.1	1	COG1680	154.77			Endozoicomonas sp. S-B4-1U
A0A0J0HGF8	KJB99867.1	1	COG1680	157.85			Enterobacter cloacae
G8LI19	AEW74343.1	1	COG1680	153.61			Enterobacter cloacae EcWSU1
A0A181D6J5	SAZ42206.1	1	COG1680	153.23			Enterobacter kobei
A0A1D3U0X1	SCQ13749.1	1	COG1680	146.29			Escherichia coli
A0A174ZK95	CUQ86392.1	1	COG1680	138.97			[Eubacterium] eligens
A0A173ZD16	CUN73366.1	1	COG1680	115.86			Faecalicatena contorta
I0K5V2	CCG99505.1	1	COG1680	143.6			Fibrella aestuarina BUZ 2
A0A1V5Y736	removed	0	n/a				Firmicutes bacterium ADurb.Bin182
A0A1V5U0S1	removed	0	n/a				Firmicutes bacterium ADurb.Bin248
A0A1V5TRM2	removed	0	n/a				Firmicutes bacterium ADurb.Bin262
A0A1J0LMH5	APD06749.1	1	COG1680	137.05			Flavobacteriaceae bacterium UJ101
P07061	CAA24927.1	1	COG1680	130.5			Flavobacterium sp. (strain K172)
A0A174PGN0	CUP57970.1	1	pfam00144	117.6			Fusicatenibacter saccharivorans
A0A174XLK7	CUQ57808.1	1	COG1680	136.28			Fusicatenibacter sp. 2789STDY5834925
W2UH15	ETN93313.1	1	COG1680	142.83			Gammaproteobacteria bacterium MOLA455
A0A161IJZ3	ANC32434.1	1	COG1680	131.27			Isoptericola dokdonensis DS-3
A0A0M6XVQ3	CTQ34802.1	1	COG1680	149.38			Jannaschia rubra
A0A1E7W046	OEZ86618.1	1	COG1680	168.64			Janthinobacterium sp. HH106
A0A0M2WJP3	KKO63049.1	1	COG1680	156.69			Janthinobacterium sp. KBS0711
K6VJY8	GAB96543.1	1	COG1680	133.58			Kineosphaera limosa NBRC 100340
A0A145MIT9	A0A145MIT9	1	COG1680	154.38			Klebsiella aerogenes (Enterobacter aerogenes)
A0A181Y488	A0A181Y488	1	COG1680	151.69			Klebsiella oxytoca
A0A1W1KFI7	SLU24553.1	1	COG1680	150.15			Klebsiella pneumoniae
A0A0M0EIV8	KON65183.1	1	COG1680	131.27			Komagataeibacter europaeus (Gluconacetobacter europaeus)
A0A0M6YQP9	CTQ52194.1	1	pfam00144	88.33			Labrenzia alba
A0A0P0M791	ALK87626.1	1	COG1680	98.14			Limnohabitans sp. 63ED37-2
A0A238KTS8	SMX46098.1	1	COG1680	145.14			Maliponia aquimaris
H8W4J4	CCG96581.1	1	COG1680	162.86			Marinobacter hydrocarbonoclasticus ATCC 49840
A0A1A8T0Y1	SBS25568.1	1	COG1680	170.18			Marinomonas spartinae
A0A068DC64	AID32220.1	1	COG1680	146.68			Mesorhizobium huakuii 7653R
A0A1R3VCN4	SIT57024.1	1	COG1680	156.31			Mesorhizobium prunaredense
M5FIQ6	CCV16028.1	1	COG1680	165.17			Mesorhizobium sp. STM 4661
A0A154NUR2	KZC02620.1	1	COG1680	135.89			Methylobacterium radiotolerans
A0A0F0L6Z7	KJL27296.1	1	COG1680	115.86			Microbacterium azadirachtae
A0A0M2HBF1	KJL43938.1	1	COG1680	78.11			Microbacterium ketosireducens
A0A0F0L4Z2	KJL28208.1	1	COG1680	89.28			Microbacterium oxydans
A0A171DW03	GAT73671.1	1	COG1680	123.95			Microbacterium sp. HM58-2
A0A0F2C737	KJQ53091.1	1	COG1680	92.37			Microbacterium sp. SA39
A0A164BYC9	KZE90582.1	1	COG1680	91.6			Microbacterium sp. TNHR37B
A0A0M2HA45	KJL41039.1	1	COG1680	114.32			Microbacterium trichothecenolyticum
F5XN73	BAK36523.1	1	COG1680	133.2			Microlunatus phosphovorus (strain ATCC 700054 / DSM 10555 / JCM 9379 / NBRC 101784 / NCIMB 13414 / VKM Ac-1990 / NM-1)
A0A1J5STQ6	OIR07397.1	1	COG1680	122.8	pfam13927	50.58	mine drainage metagenome
A0A0X8X008	BAU53359.1	1	COG1680	142.83			Mucilaginibacter gotjawali
A0A1N4P2M1	SII87258.1	1	COG1680	133.2			Mycobacterium abscessus subsp. abscessus
A0A0J6W957	KMO78172.1	1	COG1680	143.98			Mycobacterium chlorophenolicum
A0A0U0QJL1	COU89364.1	1	COG1680	86.59			Mycobacterium tuberculosis
U5EL89	GAD85874.1	1	COG1680	160.16			Nocardia asteroides NBRC 15531
A0A231GU73	OXR40169.1	1	pfam00144	119.14			Nocardia cerradoensis
A0A0B8ND93	APA95039.1	1	COG1680	115.86			Nocardia seriolae
A0A1Y5THU2	SLN62380.1	1	COG1680	153.61			Oceanibacterium hippocampi
A1RBL5	ABM06783.1	1	COG1680	128.96			Paenarthrobacter aurescens (strain TC1)
A0A0B0HYQ6	KHF33049.1	1	COG1680	123.95			Paenibacillus sp. P1XP2
A0A1E3L9K2	ODP29630.1	1	COG1680	125.88			Paenibacillus sp. TI45-13ar
A0A0A8VKA5	CEK30015.1	1	COG1680	146.68			Paeniclostridium sordellii (Clostridium sordellii)
M7NLA9	EMQ99303.1	1	COG1680	67.71			Paeniglutamicibacter gangotriensis Lz1y
A0A1U7CSL2	APW61863.1	1	COG1680	142.83			Paludisphaera borealis
A0A174I3J8	CUN11845.1	1	COG1680	140.52			Parabacteroides distasonis
A0A238KUV0	SMX46579.1	0	querry exception				Pelagimonas varians
A0A0P1H3R0	CUH89508.1	1	COG1680	151.69			Phaeobacter sp. CECT 5382
A0A1C0U4M3	OCQ52869.1	1	COG1680	110.47			Photorhabdus asymbiotica subsp. australis
A0A142WX71	AMV19408.1	1	COG1680	138.2			Planctomyces sp. SH-PL14
A0A142YP87	AMV40750.1	1	COG1680	147.06			Planctomyces sp. SH-PL62
A0A1V6DF56	removed	0	n/a				Planctomycetes bacterium ADurb.Bin126
A0A1L9P0F0	OJI94894.1	1	COG1680	142.83			Planktotalea frisia
A0A0D6IK29	ALV76382.1	1	COG1680	176.34			Pseudomonas aeruginosa
A0A127MZS5	AMO78698.1	1	COG1680	148.22			Pseudomonas citronellolis
A0A0D0SHT7	KIR21553.1	1	pfam00144	104.89			Pseudomonas fluorescens
A0A225DUD8	OWK44613.1	1	COG1680	141.29			Pseudomonas oleovorans subsp. oleovorans
A0A1B2F4H7	ANY86973.1	1	COG1680	87.36			Pseudomonas putida (Arthrobacter siderocapsulatus)
Q59719	BAA01524.1	1	COG1680	143.98			Pseudomonas sp.
A0A1B5F5J3	CRM94056.1	1	COG1680	128.57			Pseudomonas sp. 22 E 5
A0A1B5DZG3	CRM60472.1	1	COG1680	127.03			Pseudomonas sp. 37 R 15
A0A1B5DLW0	CRM45287.1	1	COG1680	128.57			Pseudomonas sp. 44 R 15
A0A105T3Y5	KVV01628.1	1	COG1680	167.48			Pseudomonas sp. TAD18
A0A0S4HPZ6	CRL47957.1	1	COG1680	169.02			Pseudomonas sp. URMO17WK12:I11
A0A1Y5TRM7	SLN66503.1	1	COG1680	142.06			Pseudoruegeria aquimaris
A0A165T3A5	KZL05366.1	1	pfam00144	85.25			Pseudovibrio axinellae
G8PHS5	AEV36518.1	1	COG1680	133.2			Pseudovibrio sp. (strain FO-BEG1)
A0A1U6GQ15	SLJ85613.1	1	COG1680	134.35			Psychrobacter sp. DAB_AL43B
D8NJ41	CBJ43063.1	1	COG1680	180.58			Ralstonia solanacearum CFBP2957
D8NBY7	CBJ37975.1	1	COG1680	186.74			Ralstonia solanacearum CMR15
D8NTL3	CBJ51172.2	1	COG1680	178.65			Ralstonia solanacearum PSI07
F6G7H0	AEG70906.1	1	COG1680	130.12			Ralstonia solanacearum (strain Po82)
G3A899	CCA86522.1	1	COG1680	180.96			Ralstonia syzygii R24
A0A1Y6GHY9	SMQ89731.1	1	COG1680	150.15			Raoultella ornithinolytica (Klebsiella ornithinolytica)
W6S0Z5	CDM60151.1	1	COG1680	126.65			Rhizobium favelukesii
A0A1W6KTY5	ARM90893.1	1	COG1680	150.53			Rhizobium sp. CIAT894
A0A1H8SL49	SEI12907.1	1	COG1680	131.66			Rhizobium tibeticum
D5ANB4	ADE86404.1	1	COG1680	135.89			Rhodobacter capsulatus (strain ATCC BAA-309 / NBRC 16581 / SB1003)
X0Q0I2	GAF44337.1	1	COG1680	126.65			Rhodococcus wratislaviensis NBRC 100605
A0A173SRD8	CUM92347.1	1	pfam00144	121.45			Roseburia intestinalis
A0A1X6ZHX4	SLN50150.1	1	COG1680	131.66			Roseivivax jejudonensis
Q161I2	ABG33361.1	1	COG1680	146.29			Roseobacter denitrificans (strain ATCC 33942 / OCh 114) (Erythrobacter sp. (strain OCh 114)) (Roseobacter denitrificans)
A0A1X6ZR95	SLN59152.1	1	pfam00144	106.05			Roseovarius gaetbuli
A0A0P1E3V5	CUH43141.1	1	COG1680	156.69			Ruegeria atlantica
A0A0P1I8K0	CUJ97681.1	1	COG1680	139.36			Ruegeria sp. CECT 5091
A0A174R2F8	CUP79693.1	1	COG1680	147.06			[Ruminococcus] torques
A0A0U6MUP1	CVA82934.1	1	COG1680	155.15			Serratia marcescens
A0A0P1FES5	CUH52959.1	1	COG1680	146.29			Shimia marina
A0A0M9EKA2	KPA23465.1	1	COG1680	132.04			Shimia sp. SK013
A0A173KVC3	ANI78048.1	1	COG1680	124.72			Sphingobium sp. EP60837
A0A245ZHX8	OWK29334.1	1	pfam00144	131.85			Sphingomonas dokdonensis
A0A245ZS72	OWK32584.1	1	COG1680	121.64			Sphingomonas mucosissima
A0A220W924	ASK89323.1	1	COG1680	117.02			Sphingorhabdus flavimaris
A0A1V5WIK4	removed	0	n/a				Spirochaetes bacterium ADurb.Bin215
A0A0T8Y0L9	CKG36687.1	1	COG1680	150.92			Streptococcus pneumoniae
A0A117E7E7	GAQ53093.1	1	pfam00144	138.02			Streptomyces acidiscabies
A0A1D2IE66	ODA72800.1	1	pfam00144	89.1			Streptomyces sp. AVP053U2
A0A1K2FPU2	SFY49811.1	1	COG1680	100.84			Streptomyces sp. F-1
A0A1B9EIG0	OCC07415.1	1	COG1680	124.72			Streptomyces sp. PTY087I2
A0A1D3URL4	SCQ22896.1	1	COG1680	142.44			Tannerella forsythia (Bacteroides forsythus)
A0A0P1FIN3	CUH67776.1	1	COG1680	135.12			Thalassobius gelatinovorus (Ruegeria gelatinovora)
A0A0P1GCY7	CUH73549.1	1	COG1680	124.72			Thalassobius mediterraneus
I3TJC5	AFK52863.1	1	COG1680	156.31			Tistrella mobilis (strain KA081020-065)
A0A1Y5S3B8	SLN31670.1	1	COG1680	145.14			Tropicibacter litoreus R37
A0A1C6JX26	SCJ86692.1	1	COG1680	180.58			uncultured Anaerotruncus sp.
A0A1C6G057	SCJ38643.1	1	COG1680	147.06			uncultured Blautia sp.
A0A1C5PZB2	SCH42505.1	1	COG1680	122.8			uncultured Clostridium sp.
A0A1C5SG29	SCH72758.1	1	COG1680	115.48			uncultured Coprococcus sp.
A0A1C6HH82	SCJ56877.1	1	COG1680	133.97			uncultured Eubacterium sp.
A0A1C5YBZ6	SCI44810.1	1	COG1680	147.06			uncultured Ruminococcus sp.
A0A0H2LTX8	KLN53679.1	1	COG1680	118.17			Variovorax paradoxus
A0A1V6JU22	removed	0	n/a				Verrucomicrobia bacterium ADurb.Bin006
A0A1V6JCM4	removed	0	n/a				Verrucomicrobia bacterium ADurb.Bin018
U3AN41	GAD74717.1	1	COG1680	145.91			Vibrio azureus NBRC 104587
A0A1C3JFB5	SBT13765.1	1	pfam00144	112.59			Vibrio celticus
A0A1B1NP12	ANS85294.1	1	COG1680	132.04			Vibrio scophthalmi
A0A1Y2SKJ5	OTA18532.1	1	COG1680	85.05			Xenorhabdus vietnamensis
SCREEN SAMPLE OF CDD PAGE:
SCREEN SAMPLE OF UNIPROT PAGE FOR NYLB AND NYLB':

## Sheet: scratch
8.9203e+43
