# Supplementary material
Source: Preprints.org preprint supplement (doi:10.20944/preprints201905.0123.v2)
Supplement: Supplementary file 3 [file supplementary_table_s2.xlsx]

## Sheet: nylb_prime_cdd
	Testing the Hypothesis that the Nylonase NylB Protein
	Arose de novo via a Frameshift Mutation
	Salvador Cordova and John Sanford
	Supplementary Table S2
	List of organisms with NylB' from UniProt, and conserved domains of NylB' homologs
	with sample screen captures from NIH CDD and UniProt websites at the bottom
NOTES:
COG1680 = CubicO group peptidase, beta-lactamase class C family [Defense mechanisms];
cd10802 = Thermus thermophiles TTHB029 and similar proteins; This subfamily is represented by an
YdjC-family protein TTHB029 from Thermus thermophilus HB8; it is similar to Escherichia coli YdjC,
a hypothetical protein encoded by the celG gene. TTHB029 functions as a homodimer. Each of monomer
consists of (beta/alpha)-barrel fold. The molecular function of TTHB029 is unclear.
cl21491 = Penicillin binding protein transpeptidase domain; for GenBank A0A011QU85 alignment was was detected with superfamily member COG1680
pfam00144 = Beta-lactamase; This family appears to be distantly related to pfam00905 and PF00768 ...
pfam03724 = META domain; Small domain family found in proteins of of unknown function. Some are
secreted and implicated in motility in bacteria. Also occurs in Leishmania spp. as an essential gene.
Over-expression in L.amazonensis increases virulence. A pair of cysteine residues show correlated
conservation, suggesting that they form a disulphide bond.
n/a = not applicable because the data was embargoed pending publication
	no. avail. cdds	121
	count nylb's	134						Average
								134.829
					Secondary	Secondary
		Conserved	Primary	Primary	Conserved	Conserved		Beta Lactamase
UniProt	Genbank	Domain Data	Conserved Domain	Conserved Domain	Domain	Domain		Domain
ID	ID	Available	ACCESSION ID	Bit score	ACCESSION ID	Bit score	ORGANISM	Bit Score
A0A0M7J5X6	CUI87454.1	1	COG1680	126.26			Achromobacter sp.	126.26
A0A1G5L686	SCZ08385.1	1	COG1680	184.04			Acinetobacter baumannii	184.04
A0A1R3U120	SCX34286.1	1	COG1680	132.43			Agrobacterium sp. DSM 25559	132.43
A0A1B3NSJ3	AOG08337.1	1	COG1680	156.69			Agrobacterium sp. RAC06	156.69
Q14T91	BAE97630.1	1	COG1680	130.12			Agromyces sp. KY5R	130.12
A0A0D6I854	CKH88456.1	1	COG1680	113.55			Alcaligenes xylosoxydans xylosoxydans (Achromobacter xylosoxidans)	113.55
A0A1B2ADK5	ANY20242.1	1	COG1680	142.44			Altererythrobacter dongtanensis	142.44
A0A0N0GL59	KPC49626.1	1	COG1680	158.23			Amantichitinum ursilacus	158.23
A0A136WJN9	KXL54559.1	1	COG1680	131.66			Anaerotignum neopropionicum	131.66
A0A222E5F8	ASP21360.1	1	COG1680	137.43			Antarctobacter heliothermus	137.43
A0A1Y5T7Z2	SLN55856.1	1	COG1680	99.3			Aquimixticola soesokkakensis	99.3
A0A1Y6AVV0	PEV28669.1	1	COG1680	111.63			Bacillus cereus	111.63
A0A1V5JGZ1	removed	0	n/a				bacterium ADurb.BinA028
A0A0A1PJ91	CEJ15450.1	1	COG1680	112.78			bacterium YEK0313	112.78
A0A180FM12	OAV73346.1	1	COG1680	138.59			Bacteroidales bacterium Barb6	138.59
A0A180FCF0	OAV69997.1	1	COG1680	136.28			Bacteroidales bacterium Barb6XT	136.28
A0A0P0GQ77	ALJ59432.1	1	cd10802	265.32	COG1680	121.64	Bacteroides cellulosilyticus	121.64	secondary domain rather than primary domain had the beta lactamase domain
A0A174JUS8	CUP00900.1	1	COG1680	157.46			Bacteroides xylanisolvens	157.46
A0A1V6CSN1	removed	0	n/a				Bacteroidetes bacterium ADurb.Bin123
A0A1V6BCZ2	removed	0	n/a				Bacteroidetes bacterium ADurb.Bin145
A0A1V5P201	removed	0	n/a				Bacteroidetes bacterium ADurb.Bin397
A0A173XH31	CUN50989.1	1	COG1680	132.04			Bifidobacterium pseudocatenulatum	132.04
A0A221AGH6	ASL47615.1	1	COG1680	124.34			Burkholderia sp. AD24	124.34
A0A1V5GNM7	removed	0	n/a				candidate division BRC1 bacterium ADurb.BinA364
A0A011QU85	EXI92700.1	1	cl21491	55.39			Candidatus Accumulibacter sp. BA-94	55.39
A0A084Y3V0	KFB69394.1	1	COG1680	79.65			Candidatus Accumulibacter sp. SK-01	79.65
A0A1Q9NG96	OLS21127.1	1	COG1680	170.95			Candidatus Thorarchaeota archaeon AB_25	170.95
M7NIZ7	EMR01730.1	1	COG1680	150.92			Cesiribacter andamanensis AMV16	150.92
A0A1X6W741	SHE13305.1	1	COG1680	157.85			Chlamydia abortus (Chlamydophila abortus)	157.85
A0A1V5QH62	removed	0	n/a				Chloroflexi bacterium ADurb.Bin344
A0A1V5PDI7	removed	0	n/a				Chloroflexi bacterium ADurb.Bin360
A0A1A7KJK9	OBW41946.1	1	pfam00144	121.45			Chryseobacterium sp. MOF25P	121.45
A0A1Y3FFF3	OUE17692.1	1	COG1680	96.99			Clavibacter michiganensis subsp. michiganensis	96.99
A0A143Y291	CVI73461.1	1	pfam00144	128.39			Clostridiales bacterium CHKCI001	128.39
A0A1R4UEF4	SJT07095.1	1	COG1680	145.14			Clostridioides difficile (Peptoclostridium difficile)	145.14
A0A174SE58	CUP94651.1	1	COG1680	140.13			[Clostridium] clostridioforme	140.13
A0A168MLP5	OAA84870.1	1	COG1680	103.15			Clostridium ljungdahlii	103.15
A0A1V4IZP8	OPJ65244.1	1	COG1680	120.1			Clostridium oryzae	120.1
A0A1S8TMH4	OOM78792.1	1	COG1680	97.76			Clostridium puniceum	97.76
A0A0U5PQ27	CUX75402.1	1	COG1680	139.75			Clostridium sp. C105KSO14	139.75
A0A0F0CJV5	KJJ74223.1	1	COG1680	141.29			Clostridium sp. FS41	141.29
A0A132HH88	AVA35740.1	1	COG1680	106.62			Cupriavidus metallidurans	106.62
A0A239WW24	SNV37894.1	1	pfam00144	141.48			Cutibacterium granulosum	141.48
A0A1V5J955	removed	0	n/a				Deltaproteobacteria bacterium ADurb.BinA014
A0A174A4R5	CUN83297.1	1	COG1680	157.46			Dorea longicatena	157.46
A0A1E7WFA0	OEZ97024.1	1	COG1680	140.13			Duganella sp. HH101	140.13
A0A1E7V5C4	OEZ55850.1	1	COG1680	139.36			Duganella sp. HH105	139.36
A0A0D5BQQ6	AJW63928.1	1	COG1680	134.74			Elizabethkingia miricola (Chryseobacterium miricola)	134.74
A0A157WDE4	SAJ28520.1	1	COG1680	162.47			Enterobacter cloacae	162.47
A0A1V6AIT8	removed	0	n/a				Firmicutes bacterium ADurb.Bin146
Q59710	BAA05089.1	1	COG1680	134.35			Flavobacterium sp. KI723T1	134.35
P07062	CAA26616.1	1	COG1680	135.12			Flavobacterium sp. (strain K172)	135.12
A0A174KSI3	CUP12139.1	1	COG1680	125.49			Fusicatenibacter saccharivorans	125.49
W2UE25	ETN92390.1	1	COG1680	161.32			Gammaproteobacteria bacterium MOLA455	161.32
A0A128EWV5	CZF78501.1	1	COG1680	130.89			Grimontia celer	130.89
A0A174B3K2	CUN94340.1	1	COG1680	154.77			Hungatella hathewayi	154.77
A0A0D1EBH5	KIT15094.1	1	COG1680	114.71			Jannaschia aquimarina	114.71
A0A0M6YFF1	CTQ48680.1	1	COG1680	144.37			Jannaschia donghaensis	144.37
A0A0M6XQ32	CTQ32271.1	1	COG1680	149.76	pfam03724	114.74	Jannaschia rubra	149.76
A0A1E7W4C8	OEZ90584.1	1	COG1680	130.5			Janthinobacterium sp. HH106	130.5
A0A0M2WN34	KKO63150.1	1	COG1680	129.73			Janthinobacterium sp. KBS0711	129.73
A0A181XAP6	SBL54634.1	1	COG1680	152.84			Klebsiella oxytoca	152.84
A0A0M6Y0X3	CTQ43334.1	1	COG1680	143.6			Labrenzia aggregata	143.6
A0A174LCT8	CUP21913.1	1	COG1680	118.56			Lachnospira pectinoschiza	118.56
A0A1D8B005	AOS46469.1	1	COG1680	122.8			Lacunisphaera limnophila	122.8
A0A0W0UST3	KTD10888.1	1	COG1680	129.73			Legionella gratiana	129.73
A0A1V5UW73	removed	0	COG1680				Lentisphaerae bacterium ADurb.Bin242
A0A0P0M7I9	ALK87917.1	1	COG1680	129.73			Limnohabitans sp. 63ED37-2	129.73
A0A143PQU0	AMY10736.1	1	COG1680	77.54			Luteitalea pratensis	77.54
A0A1C3JR26	SBT17678.1	1	COG1680	186.35			Marinomonas gallaica	186.35
A0A161SK65	KZE91550.1	1	COG1680	127.42			Microbacterium sp. TNHR37B	127.42
A0A1C9W5R1	AOS96494.1	1	COG1680	133.97			Microbulbifer aggregans	133.97
A0A1J5Q3Y3	OIQ78417.1	1	COG1680	116.25			mine drainage metagenome	116.25
A0A1N4H1G0	SII01201.1	1	COG1680	121.64			Mycobacterium abscessus subsp. abscessus	121.64
D5PH26	EFG74633.1	1	COG1680	137.82			Mycobacterium parascrofulaceum ATCC BAA-614	137.82
A0A200GVL6	OUZ04257.1	1	COG1680	136.28			Mycobacterium paratuberculosis	136.28
A0A0H5D2L7	CRL10978.1	1	COG1680	141.67			Nautella italica	141.67
A0A0U1NN44	CRK75919.1	1	COG1680	147.06			Nereida ignava	147.06
A0A1A9GPB2	ANH39275.1	1	COG1680	125.88			Nocardioides dokdonensis FR1436	125.88
A0A1Y5T0T5	SLN49476.1	1	COG1680	121.64			Oceanibacterium hippocampi	121.64
A0A238KNR1	SMX44435.1	1	COG1680	135.12			Octadecabacter ascidiaceicola	135.12
A0A0K0Y7L4	AKS46964.1	1	COG1680	136.28			Octadecabacter temperatus	136.28
A0A0B0I7C6	KHF36079.1	1	COG1680	109.31			Paenibacillus sp. P1XP2	109.31
A0A1Y5SE37	SLN37902.1	1	COG1680	136.28			Pelagicola litorisediminis	136.28
A0A238L5C6	SMX50178.1	0	querry exception				Pelagimonas varians
A0A0P1INL0	CUJ87550.1	1	COG1680	148.99			Phaeobacter sp. CECT 7735	148.99
A0A0G5TIY0	CRP67525.1	1	COG1680	135.89			Pseudomonas aeruginosa	135.89
A0A0D0TTV4	KIR24245.1	1	COG1680	128.96			Pseudomonas fluorescens	128.96
A0A1B2F7B1	ANY88065.1	1	COG1680	139.36			Pseudomonas putida (Arthrobacter siderocapsulatus)	139.36
A0A1C3GPS1	SAM32366.1	1	COG1680	133.97			Pseudomonas sp. 1 R 17	133.97
A0A1B5FEP0	CRM97274.1	1	COG1680	134.35			Pseudomonas sp. 22 E 5	134.35
A0A1B5DAM1	CRM30808.1	1	COG1680	137.43			Pseudomonas sp. 24 E 1	137.43
A0A1B5DJF5	CRM42528.1	1	pfam00144	109.9			Pseudomonas sp. 44 R 15	109.9
A0A1B5EAS6	CRM75146.1	1	pfam00144	105.28			Pseudomonas sp. 58 R 3	105.28
A0A0S4HRC6	CRL48425.1	1	COG1680	147.06			Pseudomonas sp. URMO17WK12:I11	147.06
A0A099SNY9	KUR43944.1	1	COG1680	140.52			Pseudomonas syringae pv. tomato	140.52
A0A1Y5SNP5	SLN44728.1	1	COG1680	133.58			Pseudooctadecabacter jejudonensis	133.58
A0A1Y5RVI3	SLN23768.1	1	COG1680	158.62			Pseudoruegeria aquimaris	158.62
A0A165ZGJ7	KZL19875.1	1	COG1680	135.51			Pseudovibrio axinellae	135.51
A0A165V164	KZL13197.1	1	COG1680	136.28			Pseudovibrio sp. Ad26	136.28
A0A165Q4T3	KZK98727.1	1	COG1680	136.66			Pseudovibrio sp. W74	136.66
A0A161XKM1	KZL25998.1	1	COG1680	134.74			Pseudovibrio sp. WM33	134.74
A0A1X7BXA6	SMC14336.1	1	COG1680	145.91			Roseovarius aestuarii	145.91
A0A1X6ZMI7	SLN53765.1	1	COG1680	148.22			Roseovarius gaetbuli	148.22
A0A1X6YYU5	SLN33443.1	1	COG1680	140.9			Roseovarius halotolerans	140.9
A0A1V0RJX9	ARE82093.1	1	COG1680	137.05			Roseovarius mucosus	137.05
A0A1V1UE16	GAW33969.1	1	COG1680	150.92			Roseovarius sp. A-2	150.92
A0A0L6CVV1	KNX41805.1	1	COG1680	154.77			Roseovarius tolerans	154.77
A0A238KXG2	SMX47524.1	1	COG1680	157.46			Ruegeria arenilitoris	157.46
A0A1X7A821	SLN72802.1	1	COG1680	166.32			Ruegeria meonggei	166.32
A0A0P1IH18	CUK12632.1	1	COG1680	147.45			Ruegeria sp. CECT 5091	147.45
A0A0S2I4P7	ALO17296.1	1	COG1680	156.31			Salinivirga cyanobacteriivorans	156.31
A0A0U6YWJ4	CVF13851.1	1	COG1680	152.84			Serratia marcescens	152.84
A0A0M9EEL0	KPA20195.1	1	COG1680	128.96			Shimia sp. SK013	128.96
A0A220W7L8	ASK88821.1	1	COG1680	142.83			Sphingorhabdus flavimaris	142.83
A0A1V5HU64	removed	0	n/a				Spirochaetes bacterium ADurb.BinA120
A0A0T8JK43	CJG33358.1	1	COG1680	112.01			Streptococcus pneumoniae	112.01
A0A221K285	ASM73079.1	1	COG1680	145.14			Sulfitobacter pseudonitzschiae	145.14
A0A109ZY28	AMH39403.1	1	COG1680	165.55			Tardiphaga robiniae	165.55
A0A0P1FIH6	CUH67767.1	1	COG1680	149.76			Thalassobius gelatinovorus (Ruegeria gelatinovora)	149.76
A0A0P1FSF4	CUH71927.1	1	COG1680	133.97			Thalassobius mediterraneus	133.97
A0A1Y5RU04	SLN25029.1	1	COG1680	156.69			Tropicibacter litoreus R37	156.69
A0A0N7M0Q4	CUH81113.1	1	COG1680	117.79			Tropicibacter multivorans	117.79
A0A238JFC7	SMX29115.1	1	COG1680	130.12			Tropicibacter phthalicicus	130.12
A0A1C6HKF7	SCJ57940.1	1	COG1680	154.77			uncultured Bacteroides sp.	154.77
A0A1C5VKN5	SCI11242.1	1	COG1680	148.22			uncultured Blautia sp.	148.22
A0A1C5WZV3	SCI28406.1	1	pfam00144	119.14			uncultured Clostridium sp.	119.14
A0A1C5Q3J1	SCH43822.1	1	COG1680	154.77			uncultured Dorea sp.	154.77
A0A1C6IY35	SCJ74355.1	1	COG1680	123.95			uncultured Lachnospira sp.	123.95
A0A1C5PT61	SCH40294.1	1	COG1680	133.97			uncultured Ruminococcus sp.	133.97
A0A0S3PSD0	BAT58843.1	1	COG1680	159.01			Variibacter gotjawalensis	159.01
A0A1V6GRF0	removed	0	COG1680				Verrucomicrobia bacterium ADurb.Bin070
A0A1W6VLV6	ARP40995.1	1	COG1680	103.54			Vibrio alginolyticus	103.54
A0A1C3IG13	PMF19269.1	1	COG1680	102			Vibrio splendidus	102
SAMPLE NYLB' Conserved Domains Database Page:
SCREEN SAMPLE OF UNIPROT PAGE FOR NYLB AND NYLB':

## Sheet: scratch
8.9203e+43
