# Supplementary material
Source: Preprints.org preprint supplement (doi:10.20944/preprints201905.0123.v2)
Supplement: Supplementary file 4 [file supplementary_table_s3.xlsx]

## Sheet: NylA CDD
	Testing the Hypothesis that the Nylonase NylB Protein
	Arose de novo via a Frameshift Mutation
	Salvador Cordova and John Sanford
	Supplementary Table S3
	List of organisms with NylA from uniprot, and conserved domains of NylAs
	with sample screen captures from NIH CDD and UniProt websites at the bottom
NOTES:
COG0154 = Asp-tRNAAsn/Glu-tRNAGln amidotransferase A subunit or related amidase
[Translation, ribosomal structure and biogenesis];
cl18951 = Amidase;
pfam01425 = Amidase;
PRK07869 = amidase; Provisional
PRK06061 = amidase; Provisional
pfam07501 = G5 domain; This domain is found in a wide range of extracellular proteins. It is found ...
PRK06529 = amidase; Provisional
n/a = not applicable because the data was embargoed pending publication
	no. avail. cdds	182
	count NylAs	193
					Secondary	Secondary
		Conserved	Primary	Primary	Conserved	Conserved
UNIPROT	Genbank	Domain Data	Conserved Domain	Conserved Domain	Domain	Domain
ID	ID	Available	ACCESSION ID	Bit score	ACCESSION ID	Bit score	ORGANISM
D4XAB8	EFF76383.1	1	COG0154	257.22			Achromobacter piechaudii ATCC 43553
A0A0M7DUQ9	CUI57268.1	1	COG0154	242.2			Achromobacter sp.
A0A066PM46	KDM66920.1	1	COG0154	327.33			Acidiphilium sp. JA12-A1
A0A0D8HH63	KJF16396.1	1	COG0154	303.06			Acidithrix ferrooxidans
A0A239RVT3	SNU14988.1	1	cl18951	361.83			Acinetobacter johnsonii
A0A150I2M3	KXZ73999.1	1	cl18951	364.14			Acinetobacter venetianus
A0A2P4URV2	POM27744.1	1	COG0154	330.41			Actinomadura sp. 5-2
D4YI68	EFG49104.1	1	cl18951	544.03			Aerococcus viridans ATCC 11563 = CCUG 4311
A0A1R3U232	SCX35430.1	1	COG0154	230.26			Agrobacterium sp. DSM 25559
A0A0D6INF8	CKI16847.1	1	COG0154	252.6			Alcaligenes xylosoxydans xylosoxydans (Achromobacter xylosoxidans)
A0A1B2ABP4	ANY19580.1	1	COG0154	266.08			Altererythrobacter dongtanensis
A0A178X0F6	OAP23195.1	1	cl18951	219.86			Amycolatopsis sp. M39
A0A0D6QPK1	GAO05363.1	1	COG0154	299.98			Anaeromyxobacter sp. PSR-1
A0A0U5BA19	BAU27772.1	1	cl18951	278.41			Aneurinibacillus soli
A0A1D7QVD8	AOM82949.1	1	cl18951	377.24			Bacillus beveridgei
A0A1Q9BAH0	OLP65740.1	1	cl18951	501.66			Bacillus pumilus (Bacillus mesentericus)
L8AQW9	BAM53880.1	1	pfam01425	389.35			Bacillus subtilis BEST7613
A0A090IS94	CEE00941.1	1	cl18951	529.78			Bacillus thermoamylovorans
A0A1V5J9J8	removed	0	n/a				bacterium ADurb.BinA028
A0A2H6H4J4	GBE21173.1	1	cl18951	317.7			bacterium BMS3Bbin01
A0A2H5ZNF0	GBD27233.1	1	COG0154	344.28			bacterium HR30
A0A2H6AWV7	GBD42414.1	1	COG0154	309.99			bacterium HR39
A0A2H6AZD7	GBD43293.1	1	cl18951	314.23			bacterium HR40
A0A2H6B6G8	GBD45731.1	1	COG0154	350.06			bacterium HR41
A0A0A1PD21	CEJ11088.1	1	cl18951	307.3			bacterium YEK0313
H6RLD2	CCG02458.1	1	COG0154	311.15			Blastococcus saxobsidens (strain DD2)
A0A157S5C9	SAI65612.1	1	COG0154	276.48			Bordetella ansorpii
A0A0H4WRC0	AKQ57708.1	1	COG0154	278.02			Bordetella hinzii
A0A140KUK9	CZQ35579.1	1	cl18951	98.13			Bordetella pertussis
A0A157SG71	SAI69344.1	1	COG0154	281.88			Bordetella trematum
A0A0H2WG49	AAU48320.1	1	cl18951	321.16			Burkholderia mallei (strain ATCC 23344)
A2S6W5	ABN01555.1	1	cl18951	321.16			Burkholderia mallei (strain NCTC 10229)
A0A1S0SB87	CFL38648.1	1	cl18951	320.78			Burkholderia pseudomallei (Pseudomonas pseudomallei)
Q3JY82	ABA50489.1	1	cl18951	321.55			Burkholderia pseudomallei (strain 1710b)
A0A221AB94	ASL45854.1	1	COG0154	257.22			Burkholderia sp. AD24
V9TR00	AHC73309.1	1	COG0154	313.46			Candidatus Endolissoclinum faulkneri L5
K8EDK6	CCO09833.2	1	cl18951	411.91			Carnobacterium maltaromaticum LMA28
A0A0E9FL18	CRH82220.1	1	cl18951	136.49			Chlamydia trachomatis
F8GPZ8	AEI79351.1	1	cl18951	265.69			Cupriavidus necator (strain ATCC 43291 / DSM 13513 / N-1) (Ralstonia eutropha)
A0A239WBU5	SNV31669.1	1	COG0154	271.09			Cutibacterium granulosum
A0A1V6KGF2	removed	0	n/a				Deltaproteobacteria bacterium ADurb.Bin002
A0A1V6IQ42	removed	0	n/a				Deltaproteobacteria bacterium ADurb.Bin022
A0A1V6G4I0	removed	0	n/a				Deltaproteobacteria bacterium ADurb.Bin072
A0A1V6AWT2	removed	0	n/a				Deltaproteobacteria bacterium ADurb.Bin151
A0A1V5HE73	removed	0	n/a				Deltaproteobacteria bacterium ADurb.BinA179
A0A239V818	SNV18335.1	1	cl18951	368.06			Dermatophilus congolensis
F5SJP9	EGK08499.1	1	cl18951	489.72			Desmospora sp. 8437
C0X1J8	EEI13129.1	1	cl18951	527.47			Enterococcus faecalis TX0104
A0A0D8FVF4	KJE77106.1	1	cl18951	314.84			Ferrimicrobium acidiphilum DSM 19497
P13398	BAA05090.1	1	COG0154	288.42			Flavobacterium sp. (strain K172)
A0A222TFI4	ASR01485.1	1	PRK07869	683.64			Gordonia rubripertincta (Rhodococcus corallinus)
C8NG30	EEW37516.1	1	cl18951	691.18			Granulicatella adiacens ATCC 49175
A0A059NVE7	CDQ23279.1	1	COG0154	316.93			Halobacillus karajensis
A0A2C9D0T4	SON53778.1	0	querry exception				Hartmannibacter diazotrophicus
A0A1E7WAM3	OEZ93467.1	1	COG0154	292.28			Janthinobacterium sp. HH106
A0A0M2WHD7	KKO62249.1	1	COG0154	283.8			Janthinobacterium sp. KBS0711
A0A1S6IQB3	AQS53746.1	1	cl18951	591.41			Jeotgalibaca dankookensis
A0A181C565	SAY46675.1	1	COG0154	311.92			Komagataeibacter rhaeticus
A0A0M6Z8M8	CTQ64276.1	1	cl18951	297.67			Labrenzia alba
C2D288	EEI71107.1	1	cl18951	494.72			Lactobacillus brevis subsp. gravesensis ATCC 27305
C0WQT6	EEI19652.1	1	cl18951	494.72			Lactobacillus buchneri ATCC 11577
J9W3Z9	AFS01208.1	1	cl18951	482.78			Lactobacillus buchneri CD034
A0A2N9KZL5	SPE16009.1	1	cl18951	517.45			Lactobacillus fermentum
C0WXY8	EEI22090.1	1	cl18951	513.6			Lactobacillus fermentum ATCC 14931
C0XGF7	EEI25501.1	1	cl18951	498.19			Lactobacillus hilgardii DSM 20176 = ATCC 8290
C8PAP3	EEW52532.1	1	cl18951	410.75			Lactobacillus iners DSM 13335
C2FBN4	EEI68757.1	1	cl18951	553.27			Lactobacillus paracasei subsp. paracasei ATCC 25302
E7FSC6	EFZ34169.1	1	cl18951	546.73			Lactobacillus ruminis ATCC 25644
A0A1E7X8H4	OFA09389.1	1	cl18951	489.72			Lactobacillus sunkii
C2ESU0	EEJ41066.1	1	cl18951	521.3			Lactobacillus vaginalis DSM 5837 = ATCC 49540
A0A173M330	BAV01662.1	1	cl18951	415.37			Lactococcus garvieae
A0A078KW70	CDZ75999.1	1	COG0154	298.05			Legionella massiliensis
A0A128ZD65	CZI36732.1	1	COG0154	244.51			Legionella pneumophila
A0A110AWJ2	BAU43134.1	1	COG0154	341.97			Leptolyngbya sp. O-77
Q72PS5	AAS70961.1	1	cl18951	398.04			Leptospira interrogans serogroup Icterohaemorrhagiae serovar copenhageni (strain Fiocruz L1-130)
A0A2P2D2K7	GBF38899.1	1	cl18951	368.38			Leptospira sp. E8
A0A0N7J8F9	ALK88080.1	1	COG0154	291.51			Limnohabitans sp. 63ED37-2
A0A0Y7J7Z3	CWW90658.1	1	cl18951	527.85			Listeria monocytogenes
A0A238LBI3	SMY06326.1	1	COG0154	299.59			Loktanella marina
A0A238K804	SMX38617.1	1	COG0154	298.44			Maliponia aquimaris
E4PFN8	ADP96787.1	1	PRK07869	677.47			Marinobacter adhaerens (strain DSM 23420 / HP15)
H8WBP3	CCG93690.1	1	COG0154	368.16			Marinobacter hydrocarbonoclasticus ATCC 49840
A0A1W6K3W3	ARM82123.1	1	cl18951	353.36			Marinobacter salarius
A0A1C3JP51	A0A1C3JP51	1	COG0154	316.93			Marinomonas gallaica
A0A1A8T5V6	SBS27780.1	1	COG0154	296.9			Marinomonas spartinae
A0A068DFK2	AID33410.1	1	COG0154	308.45			Mesorhizobium huakuii 7653R
A0A090FKT7	CDX44609.1	1	COG0154	321.55			Mesorhizobium plurifarium
A0A090E4Q5	CDX21843.1	1	COG0154	318.47			Mesorhizobium sp. ORS3359
A0A090ENA9	CDX32438.1	1	COG0154	318.47			Mesorhizobium sp. SOD10
A0A1E3H3I1	ODN70879.1	1	COG0154	179.03			Methylobrevis pamukkalensis
A0A0F0LDS8	KJL31283.1	1	cl18951	255.29			Microbacterium azadirachtae
A0A2P8AY42	PSK65391.1	1	COG0154	318.08			Micromonospora sp. MH33
A0A1J5RNJ1	OIQ97289.1	1	cl18951	295.96			mine drainage metagenome
A0A0U0ZTE6	CPV65311.1	1	COG0154	334.65			Mycobacterium abscessus
A0A1N0DAQ6	SHV30349.1	1	COG0154	330.41			Mycobacterium abscessus subsp. abscessus
A0A1N6AFE1	SIN32756.1	1	COG0154	332.72			Mycobacterium abscessus subsp. bolletii
A0A1T7W6V6	SKM64002.1	1	COG0154	332.72			Mycobacterium abscessus subsp. massiliense
A0A0J6W9F6	KMO78503.1	1	PRK07869	789.57			Mycobacterium chlorophenolicum
A0A0J6W7L7	KMO77627.1	1	PRK06061	769.25			Mycobacterium chubuense
A0A1V3XQ88	OOK80926.1	1	cl18951	46.61			Mycobacterium kansasii
X7Y501	EUA01906.1	1	cl18951	46.61			Mycobacterium kansasii 824
A0A0J6Y9F2	KMO69576.1	1	COG0154	318.85			Mycobacterium obuense
D5P7P7	EFG77891.1	1	PRK06061	789.28			Mycobacterium parascrofulaceum ATCC BAA-614
A0A202FU52	OUZ03240.1	1	COG0154	327.33			Mycobacterium paratuberculosis
A0A0D6IBQ3	CKH95081.1	1	COG0154	251.44			Mycobacterium smegmatis
L8F948	ELQ87854.1	1	PRK06061	786.2			Mycobacterium smegmatis (strain MKD8)
A0A240AD36	SNV81209.1	1	cl18951	321.16			Mycobacterium terrae
A0A0T9S9J6	CNJ51382.1	1	cl18951	79.26			Mycobacterium tuberculosis
X8FKH9	EUA93672.1	1	cl18951	102.27			Mycobacterium ulcerans str. Harvey
X8BHR1	EUA43006.1	0	no entry				Mycobacterium xenopi 3993
Q1CYM7	ABF91800.1	1	COG0154	346.97			Myxococcus xanthus (strain DK 1622)
F9EZJ5	EGQ75050.1	1	COG0154	299.98			Neisseria macacae ATCC 33926
G4CK47	EGY51774.1	1	COG0154	302.29			Neisseria shayeganii 871
A0A2P6L7Y9	PRD34697.1	1	cl18951	357.98			Nephila clavipes (Golden silk orbweaver)
W9V8H0	EXJ12342.1	1	cl18951	115.47			Nitrincola nitratireducens
A0A231GW69	OXR40869.1	1	COG0154	284.19			Nocardia cerradoensis
A0A0H5NGA5	CRY74523.1	1	PRK07869	682.1			Nocardia farcinica
A0A1A9GJH0	ANH38404.1	1	COG0154	263.77			Nocardioides dokdonensis FR1436
A0A1Y5TGA2	SLN63409.1	1	COG0154	326.94			Oceanibacterium hippocampi
A0A0A1MHT8	CEI82653.1	1	cl18951	464.29			Oceanobacillus oncorhynchi
W9AFE3	CDO04193.1	1	cl18951	470.46			Oceanobacillus picturae
R4YTJ3	CCK77043.1	1	COG0154	366.23			Oleispira antarctica RB-8
A0A0E3WGY6	CQR54353.1	1	cl18951	490.49			Paenibacillus riograndensis SBR5
A0A2M9NE97	PJN62497.1	1	cl18951	514.75			Paenibacillus sp. GM1FR
A0A239SAD1	SNU82172.1	1	COG0154	275.33			Pandoraea sputorum
A0A0U1KJ51	CQR46008.1	1	cl18951	479.7			Paraliobacillus sp. PM-2
A0A1X7AFR7	SMA36991.1	1	COG0154	364.69			Parendozoicomonas haliclonae
A0A238KTK6	SMX46135.1	0	querry exception				Pelagimonas varians
A0A0P1GXR8	CUH87486.1	1	cl18951	114.7			Phaeobacter sp. CECT 5382
A0A073CF91	KEI66786.1	1	COG0154	341.97			Planktothrix agardhii NIVA-CYA 126/8
K8WC88	EKT58174.1	1	COG0154	299.98			Providencia burhodogranariea DSM 19968
A0A024H881	CCQ47959.1	1	COG0154	273.02			Pseudarthrobacter siccitolerans
A0A127MTZ1	AMO76736.1	1	COG0154	291.89			Pseudomonas citronellolis
A0A1Q9QYC4	OLS60161.1	1	cl18951	287.65			Pseudomonas putida (Arthrobacter siderocapsulatus)
A0A1C3GU74	SAM33941.1	1	cl18951	319.62			Pseudomonas sp. 1 R 17
A0A1B5ENX2	CRM88048.1	1	cl18951	308.45			Pseudomonas sp. 22 E 5
A0A2H2YM22	CRM80544.1	1	cl18951	308.45			Pseudomonas sp. 31 E 6
A0A1B5DRR8	CRM50573.1	1	cl18951	318.85			Pseudomonas sp. 58 R 3
P13397	AAA25908.1	1	COG0154	285.73			Pseudomonas sp. (strain NK87)
A0A105T8Z6	KVV04240.1	1	cl18951	318.08			Pseudomonas sp. TAD18
A0A099SXA7	KUR41590.1	1	COG0154	305.76			Pseudomonas syringae pv. tomato
A0A1Y2NAK7	OSY43938.1	1	cl18951	612.76			Pseudonocardia autotrophica (Amycolata autotrophica) (Nocardia autotrophica)
A0A165TLS8	KZL06191.1	1	cl18951	211.99			Pseudovibrio sp. Ad26
A0A1R4EGM1	SJM37569.1	1	COG0154	298.05			Psychrobacter pasteurii
A0A1R4GUP9	SJM71966.1	1	COG0154	285.34			Psychrobacter piechaudii
F5SNM6	EGK14717.1	1	COG0154	285.34			Psychrobacter sp. 1501(2011)
A0A1U6GJN2	SLJ83708.1	1	COG0154	284.19			Psychrobacter sp. DAB_AL43B
A0A166H147	KZX19744.1	1	cl18951	130.49			Rathayibacter tanaceti
A0A1W6KTY7	ARM90891.1	1	cl18951	281.88			Rhizobium sp. CIAT894
A0A1H8N0M8	SEI09855.1	1	cl18951	165.54			Rhizobium tibeticum
A0A1F2Q4G2	OFV77896.1	1	cl18951	291.12			Rhodococcus erythropolis (Arthrobacter picolinophilus)
A0A165LS60	AMY53540.1	1	COG0154	325.4			Rhodococcus fascians D188
A0A0D8I4R7	KJF25039.1	1	PRK07869	738.72			Rhodococcus sp. AD45
A0A2I9DAU8	GBF16438.1	1	PRK07869	749.12			Rhodococcus sp. Br-6
A0A143Q7E3	AMY18317.1	1	cl18951	315.99			Rhodococcus sp. PBTS 1
A0A143QHT7	AMY22499.1	1	COG0154	326.56			Rhodococcus sp. PBTS 2
A0A1Y5RXJ7	SLN27523.1	1	COG0154	207.92			Roseisalinus antarcticus
A0A1Q2YXL0	GAV35946.1	1	COG0154	271.86			Roseomonas sp. TAS13
A0A0P1E894	CUH44666.1	1	COG0154	209.84			Ruegeria atlantica
Q5LQG3	AAV95777.1	1	COG0154	280.72			Ruegeria pomeroyi (strain ATCC 700808 / DSM 15171 / DSS-3) (Silicibacter pomeroyi)
A0A0P1I6U8	CUJ93919.1	1	COG0154	199.06			Ruegeria sp. CECT 5091
A0A0X2PD81	CUW25003.1	1	COG0154	265.31			Serratia
A0A2H1LLX6	SMZ58976.1	1	COG0154	265.31			Serratia grimesii
A0A021XH97	EYR84628.1	1	COG0154	301.91			Shinella sp. DD12
F7XC84	AEH81375.1	1	COG0154	278.41			Sinorhizobium meliloti (strain SM11)
A0A1V5I0C5	removed	0	n/a				Spirochaetes bacterium ADurb.BinA120
A0A239WPY8	SNV36266.1	1	cl18951	339.87	pfam07501	51.38	Streptococcus acidominimus
A0A0G6P5S0	CRV30531.1	1	PRK06529	900.34			Streptococcus equi subsp. equi
A0A239ST89	SNU88701.1	1	cl18951	790.56			Streptococcus merionis
Q8DTV5	AAN58903.1	1	PRK06529	909.2			Streptococcus mutans serotype c (strain ATCC 700610 / UA159)
A0A0Y1XIJ5	CVX74856.1	1	cl18951	112.22			Streptococcus pneumoniae
F8LIY3	CCB93303.1	1	cl18951	813.67			Streptococcus salivarius (strain CCHSS3)
A0A116M201	CYV23554.1	1	cl18951	786.71			Streptococcus suis
A0A2N9B277	SOR77440.1	1	COG0154	290.35			Streptomyces chartreusis NRRL 3882
A0A2K8PAY7	ATZ23280.1	1	COG0154	240.66			Streptomyces lavendulae subsp. lavendulae
A0A1Y2NKS5	OSY48102.1	1	COG0154	282.26			Streptomyces platensis
A0A0U5HFC4	CUW32201.1	1	COG0154	325.4			Streptomyces reticuli
A0A124C331	GAQ60006.1	1	COG0154	338.11			Streptomyces scabiei
A0A2P7ZYE4	PSK53232.1	1	cl18951	253.37			Streptomyces sp. 111WW2
A0A1D2IJJ3	ODA74583.1	1	cl18951	620.08			Streptomyces sp. AVP053U2
A0A1K2FZV5	SFY52671.1	1	COG0154	279.56			Streptomyces sp. F-1
A0A2K8REQ6	AUA15301.1	1	COG0154	264.54			Streptomyces sp. M56
A0A2P9FEF6	SPF06182.1	1	COG0154	339.27			Streptomyces sp. MA5143a
A0A068N7F4	AIE76027.1	1	pfam01425	377.02			Synechocystis sp. (strain PCC 6714) (Aphanocapsa sp. (strain PCC 6714))
A0A1V4XGE4	removed	0	n/a				Syntrophaceae bacterium PtaB.Bin095
A0A238D0E3	SBP86699.1	1	COG0154	340.81			Thiomonas delicata (Thiomonas cuprina)
A0A238DI14	SCC91137.1	1	COG0154	345.82			Thiomonas sp. X19
I3TLI8	AFK53626.1	1	cl18951	304.21			Tistrella mobilis (strain KA081020-065)
A0A0H2LVZ3	KLN54384.1	1	COG0154	262.62			Variovorax paradoxus
A0A1C3JAB8	SBT12094.1	1	COG0154	268.01			Vibrio celticus
A0A1C3II24	SBS61074.1	1	COG0154	266.85			Vibrio splendidus
A0A024QGQ4	CDQ41684.1	1	cl18951	473.15			Virgibacillus massiliensis
A0A2K9J0P4	AUJ25274.1	1	cl18951	460.83			Virgibacillus pantothenticus
SAMPLE SCREEN SHOT OF CONSERVED DOMAINS DATABASE SCREEN:
SAMPLE SCREEN SHOT OF UNIPROT NYLA SEARCH:

## Sheet: Sheet1_2
D4XAB8	Achromobacter piechaudii ATCC 43553
A0A0M7DUQ9	Achromobacter sp.
A0A066PM46	Acidiphilium sp. JA12-A1
A0A0D8HH63	Acidithrix ferrooxidans
A0A239RVT3	Acinetobacter johnsonii
A0A150I2M3	Acinetobacter venetianus
A0A2P4URV2	Actinomadura sp. 5-2
D4YI68	Aerococcus viridans ATCC 11563 = CCUG 4311
A0A1R3U232	Agrobacterium sp. DSM 25559
A0A0D6INF8	Alcaligenes xylosoxydans xylosoxydans (Achromobacter xylosoxidans)
A0A1B2ABP4	Altererythrobacter dongtanensis
A0A178X0F6	Amycolatopsis sp. M39
A0A0D6QPK1	Anaeromyxobacter sp. PSR-1
A0A0U5BA19	Aneurinibacillus soli
A0A1D7QVD8	Bacillus beveridgei
A0A1Q9BAH0	Bacillus pumilus (Bacillus mesentericus)
L8AQW9	Bacillus subtilis BEST7613
A0A090IS94	Bacillus thermoamylovorans
A0A1V5J9J8	bacterium ADurb.BinA028
A0A2H6H4J4	bacterium BMS3Bbin01
A0A2H5ZNF0	bacterium HR30
A0A2H6AWV7	bacterium HR39
A0A2H6AZD7	bacterium HR40
A0A2H6B6G8	bacterium HR41
A0A0A1PD21	bacterium YEK0313
H6RLD2	Blastococcus saxobsidens (strain DD2)
A0A157S5C9	Bordetella ansorpii
A0A0H4WRC0	Bordetella hinzii
A0A140KUK9	Bordetella pertussis
A0A157SG71	Bordetella trematum
A0A0H2WG49	Burkholderia mallei (strain ATCC 23344)
A2S6W5	Burkholderia mallei (strain NCTC 10229)
A0A1S0SB87	Burkholderia pseudomallei (Pseudomonas pseudomallei)
Q3JY82	Burkholderia pseudomallei (strain 1710b)
A0A221AB94	Burkholderia sp. AD24
V9TR00	Candidatus Endolissoclinum faulkneri L5
K8EDK6	Carnobacterium maltaromaticum LMA28
A0A0E9FL18	Chlamydia trachomatis
F8GPZ8	Cupriavidus necator (strain ATCC 43291 / DSM 13513 / N-1) (Ralstonia eutropha)
A0A239WBU5	Cutibacterium granulosum
A0A1V6KGF2	Deltaproteobacteria bacterium ADurb.Bin002
A0A1V6IQ42	Deltaproteobacteria bacterium ADurb.Bin022
A0A1V6G4I0	Deltaproteobacteria bacterium ADurb.Bin072
A0A1V6AWT2	Deltaproteobacteria bacterium ADurb.Bin151
A0A1V5HE73	Deltaproteobacteria bacterium ADurb.BinA179
A0A239V818	Dermatophilus congolensis
F5SJP9	Desmospora sp. 8437
C0X1J8	Enterococcus faecalis TX0104
A0A0D8FVF4	Ferrimicrobium acidiphilum DSM 19497
P13398	Flavobacterium sp. (strain K172)
A0A222TFI4	Gordonia rubripertincta (Rhodococcus corallinus)
C8NG30	Granulicatella adiacens ATCC 49175
A0A059NVE7	Halobacillus karajensis
A0A2C9D0T4	Hartmannibacter diazotrophicus
A0A1E7WAM3	Janthinobacterium sp. HH106
A0A0M2WHD7	Janthinobacterium sp. KBS0711
A0A1S6IQB3	Jeotgalibaca dankookensis
A0A181C565	Komagataeibacter rhaeticus
A0A0M6Z8M8	Labrenzia alba
C2D288	Lactobacillus brevis subsp. gravesensis ATCC 27305
C0WQT6	Lactobacillus buchneri ATCC 11577
J9W3Z9	Lactobacillus buchneri CD034
A0A2N9KZL5	Lactobacillus fermentum
C0WXY8	Lactobacillus fermentum ATCC 14931
C0XGF7	Lactobacillus hilgardii DSM 20176 = ATCC 8290
C8PAP3	Lactobacillus iners DSM 13335
C2FBN4	Lactobacillus paracasei subsp. paracasei ATCC 25302
E7FSC6	Lactobacillus ruminis ATCC 25644
A0A1E7X8H4	Lactobacillus sunkii
C2ESU0	Lactobacillus vaginalis DSM 5837 = ATCC 49540
A0A173M330	Lactococcus garvieae
A0A078KW70	Legionella massiliensis
A0A128ZD65	Legionella pneumophila
A0A110AWJ2	Leptolyngbya sp. O-77
Q72PS5	Leptospira interrogans serogroup Icterohaemorrhagiae serovar copenhageni (strain Fiocruz L1-130)
A0A2P2D2K7	Leptospira sp. E8
A0A0N7J8F9	Limnohabitans sp. 63ED37-2
A0A0Y7J7Z3	Listeria monocytogenes
A0A238LBI3	Loktanella marina
A0A238K804	Maliponia aquimaris
E4PFN8	Marinobacter adhaerens (strain DSM 23420 / HP15)
H8WBP3	Marinobacter hydrocarbonoclasticus ATCC 49840
A0A1W6K3W3	Marinobacter salarius
A0A1C3JP51	Marinomonas gallaica
A0A1A8T5V6	Marinomonas spartinae
A0A068DFK2	Mesorhizobium huakuii 7653R
A0A090FKT7	Mesorhizobium plurifarium
A0A090E4Q5	Mesorhizobium sp. ORS3359
A0A090ENA9	Mesorhizobium sp. SOD10
A0A1E3H3I1	Methylobrevis pamukkalensis
A0A0F0LDS8	Microbacterium azadirachtae
A0A2P8AY42	Micromonospora sp. MH33
A0A1J5RNJ1	mine drainage metagenome
A0A0U0ZTE6	Mycobacterium abscessus
A0A1N0DAQ6	Mycobacterium abscessus subsp. abscessus
A0A1N6AFE1	Mycobacterium abscessus subsp. bolletii
A0A1T7W6V6	Mycobacterium abscessus subsp. massiliense
A0A0J6W9F6	Mycobacterium chlorophenolicum
A0A0J6W7L7	Mycobacterium chubuense
A0A1V3XQ88	Mycobacterium kansasii
X7Y501	Mycobacterium kansasii 824
A0A0J6Y9F2	Mycobacterium obuense
D5P7P7	Mycobacterium parascrofulaceum ATCC BAA-614
A0A202FU52	Mycobacterium paratuberculosis
A0A0D6IBQ3	Mycobacterium smegmatis
L8F948	Mycobacterium smegmatis (strain MKD8)
A0A240AD36	Mycobacterium terrae
A0A0T9S9J6	Mycobacterium tuberculosis
X8FKH9	Mycobacterium ulcerans str. Harvey
X8BHR1	Mycobacterium xenopi 3993
Q1CYM7	Myxococcus xanthus (strain DK 1622)
F9EZJ5	Neisseria macacae ATCC 33926
G4CK47	Neisseria shayeganii 871
A0A2P6L7Y9	Nephila clavipes (Golden silk orbweaver)
W9V8H0	Nitrincola nitratireducens
A0A231GW69	Nocardia cerradoensis
A0A0H5NGA5	Nocardia farcinica
A0A1A9GJH0	Nocardioides dokdonensis FR1436
A0A1Y5TGA2	Oceanibacterium hippocampi
A0A0A1MHT8	Oceanobacillus oncorhynchi
W9AFE3	Oceanobacillus picturae
R4YTJ3	Oleispira antarctica RB-8
A0A0E3WGY6	Paenibacillus riograndensis SBR5
A0A2M9NE97	Paenibacillus sp. GM1FR
A0A239SAD1	Pandoraea sputorum
A0A0U1KJ51	Paraliobacillus sp. PM-2
A0A1X7AFR7	Parendozoicomonas haliclonae
A0A238KTK6	Pelagimonas varians
A0A0P1GXR8	Phaeobacter sp. CECT 5382
A0A073CF91	Planktothrix agardhii NIVA-CYA 126/8
K8WC88	Providencia burhodogranariea DSM 19968
A0A024H881	Pseudarthrobacter siccitolerans
A0A127MTZ1	Pseudomonas citronellolis
A0A1Q9QYC4	Pseudomonas putida (Arthrobacter siderocapsulatus)
A0A1C3GU74	Pseudomonas sp. 1 R 17
A0A1B5ENX2	Pseudomonas sp. 22 E 5
A0A2H2YM22	Pseudomonas sp. 31 E 6
A0A1B5DRR8	Pseudomonas sp. 58 R 3
P13397	Pseudomonas sp. (strain NK87)
A0A105T8Z6	Pseudomonas sp. TAD18
A0A099SXA7	Pseudomonas syringae pv. tomato
A0A1Y2NAK7	Pseudonocardia autotrophica (Amycolata autotrophica) (Nocardia autotrophica)
A0A165TLS8	Pseudovibrio sp. Ad26
A0A1R4EGM1	Psychrobacter pasteurii
A0A1R4GUP9	Psychrobacter piechaudii
F5SNM6	Psychrobacter sp. 1501(2011)
A0A1U6GJN2	Psychrobacter sp. DAB_AL43B
A0A166H147	Rathayibacter tanaceti
A0A1W6KTY7	Rhizobium sp. CIAT894
A0A1H8N0M8	Rhizobium tibeticum
A0A1F2Q4G2	Rhodococcus erythropolis (Arthrobacter picolinophilus)
A0A165LS60	Rhodococcus fascians D188
A0A0D8I4R7	Rhodococcus sp. AD45
A0A2I9DAU8	Rhodococcus sp. Br-6
A0A143Q7E3	Rhodococcus sp. PBTS 1
A0A143QHT7	Rhodococcus sp. PBTS 2
A0A1Y5RXJ7	Roseisalinus antarcticus
A0A1Q2YXL0	Roseomonas sp. TAS13
A0A0P1E894	Ruegeria atlantica
Q5LQG3	Ruegeria pomeroyi (strain ATCC 700808 / DSM 15171 / DSS-3) (Silicibacter pomeroyi)
A0A0P1I6U8	Ruegeria sp. CECT 5091
A0A0X2PD81	Serratia
A0A2H1LLX6	Serratia grimesii
A0A021XH97	Shinella sp. DD12
F7XC84	Sinorhizobium meliloti (strain SM11)
A0A1V5I0C5	Spirochaetes bacterium ADurb.BinA120
A0A239WPY8	Streptococcus acidominimus
A0A0G6P5S0	Streptococcus equi subsp. equi
A0A239ST89	Streptococcus merionis
Q8DTV5	Streptococcus mutans serotype c (strain ATCC 700610 / UA159)
A0A0Y1XIJ5	Streptococcus pneumoniae
F8LIY3	Streptococcus salivarius (strain CCHSS3)
A0A116M201	Streptococcus suis
A0A2N9B277	Streptomyces chartreusis NRRL 3882
A0A2K8PAY7	Streptomyces lavendulae subsp. lavendulae
A0A1Y2NKS5	Streptomyces platensis
A0A0U5HFC4	Streptomyces reticuli
A0A124C331	Streptomyces scabiei
A0A2P7ZYE4	Streptomyces sp. 111WW2
A0A1D2IJJ3	Streptomyces sp. AVP053U2
A0A1K2FZV5	Streptomyces sp. F-1
A0A2K8REQ6	Streptomyces sp. M56
A0A2P9FEF6	Streptomyces sp. MA5143a
A0A068N7F4	Synechocystis sp. (strain PCC 6714) (Aphanocapsa sp. (strain PCC 6714))
A0A1V4XGE4	Syntrophaceae bacterium PtaB.Bin095
Q9TCX9	Temnothorax nylanderi
A0A238D0E3	Thiomonas delicata (Thiomonas cuprina)
A0A238DI14	Thiomonas sp. X19
I3TLI8	Tistrella mobilis (strain KA081020-065)
A0A0H2LVZ3	Variovorax paradoxus
A0A1C3JAB8	Vibrio celticus
A0A1C3II24	Vibrio splendidus
A0A024QGQ4	Virgibacillus massiliensis
A0A2K9J0P4	Virgibacillus pantothenticus
