# Supplementary material
Source: Preprints.org preprint supplement (doi:10.20944/preprints201905.0123.v2)
Supplement: Supplementary file 5 [file supplementary_table_s4.xlsx]

## Sheet: NylA CDD
	Testing the Hypothesis that the Nylonase NylB Protein
	Arose de novo via a Frameshift Mutation
	Salvador Cordova and John Sanford
	Supplementary Table S4
	List of organisms with NylC from uniprot, and conserved domains of NylCs
	with sample screen captures from NIH CDD and UniProt websites at the bottom
NOTES:
cd00123 = DmpA/OAT superfamily; composed of L-aminopeptidase D-amidase/D-esterase (DmpA),
ornithine acetyltransferase (OAT) and similar proteins. DmpA is an aminopeptidase that releases N-terminal D and L
amino acids from peptide substrates. This group represents one of the rare aminopeptidases that are not metalloenzymes.
DmpA shows similarity in catalytic mechanism to N-terminal nucleophile (Ntn) hydrolases, which are enzymes that catalyze
the cleavage of amide bonds through the nucleophilic attack of the side chain of an N-terminal serine, threonine, or cysteine.
OAT catalyzes the first and fifth steps in arginine biosynthesis, coupling acetylation of glutamate with deacetylation of
N-acetylornithine, which allows recycling of the acetyl group in the arginine biosynthetic pathway. The superfamily also
contains an enzyme, endo-type 6-aminohexanoate-oligomer hydrolase, that have been shown to be involved in nylon
degradation. Proteins in this superfamily undergo autocatalytic cleavage of an inactive precursor at the site immediately
upstream to the catalytic nucleophile.
cl00603 = DmpA/OAT superfamily; composed of L-aminopeptidase D-amidase/D-esterase (DmpA), ornithine
acetyltransferase (OAT) and similar proteins. DmpA is an aminopeptidase that releases
N-terminal D and L amino acids from peptide substrates. This group represents one of the rare
aminopeptidases that are not metalloenzymes. DmpA shows similarity in catalytic mechanism to
N-terminal nucleophile (Ntn) hydrolases, which are enzymes that catalyze the cleavage of amide
bonds through the nucleophilic attack of the side chain of an N-terminal serine, threonine, or
cysteine. OAT catalyzes the first and fifth steps in arginine biosynthesis, coupling acetylation
of glutamate with deacetylation of N-acetylornithine, which allows recycling of the acetyl group
in the arginine biosynthetic pathway. The superfamily also contains an enzyme, endo-type
6-aminohexanoate-oligomer hydrolase, that have been shown to be involved in nylon degradation.
Proteins in this superfamily undergo autocatalytic cleavage of an inactive precursor at the site
immediately upstream to the catalytic nucleophile.
cd02252 = nylC-like family; composed of proteins with similarity to Flavobacterium endo-type
6-aminohexanoate-oligomer hydrolase (EIII), the product of the nylon oligomer degradation gene,
nylC. EIII is an amide hydrolase that catalyzes the degradation of highly-polymerized
6-aminohexanoate oligomers. Together with other nylon degradation enzymes, such as
6-aminohexanoate cyclic dimer hydrolase (EI) and 6-aminohexanoate dimer hydrolase (EII),
EIII plays a role in the detoxification and biological removal of the synthetic by-products of
nylon manufacture. EIII shows sequence similarity to L-aminopeptidase D-amidase/D-esterase (DmpA),
an aminopeptidase that releases N-terminal D and L amino acids from peptide substrates. Like DmpA,
EIII undergoes autocatalytic cleavage in front of a nucleophile to form a heterodimer. DmpA shows
similarity in catalytic mechanism to N-terminal nucleophile (Ntn) hydrolases, which are enzymes
that catalyze the cleavage of amide bonds through the nucleophilic attack of the side chain of an
N-terminal serine, threonine, or cysteine.
	no. avail. cdds	7
	count NylCs	7
					Secondary	Secondary
		Conserved	Primary	Primary	Conserved	Conserved
UNIPROT	Genbank	Domain Data	Conserved Domain	Conserved Domain	Domain	Domain
ID	ID	Available	ACCESSION ID	Bit score	ACCESSION ID	Bit score	ORGANISM
Q79F77	BAA01528.1	1	cd00123	313.18			Flavobacterium sp.
Q57326	BAA05088.1	1	cd00123	313.18			Flavobacterium sp. KI723T1
Q1EPR5	BAE95769.2	1	cd00123	305.47			Agromyces sp. KY5R
Q1EPR4	BAE95770.1	1	cd00123	303.16			Kocuria sp. KY2
U2XM45	GAD34180.1	1	cl00603	196.68			Microbacterium sp. TS-1
C0R138	ACN83826.1	1	cd02252	306.46			Brachyspira hyodysenteriae (strain ATCC 49526 / WA1)
G0EJE2	AEM21141.1	1	cd02252	304.15			Brachyspira intermedia (strain ATCC 51140 / PWS/A) (Serpulina intermedia)
SAMPLE CDD WEBSITE SCREEN SHOT:
SAMPLE SCREEN CAPTURE FROM UNIPROT:

## Sheet: Sheet1
P07062	Flavobacterium sp. (strain K172)
Q79F77	Flavobacterium sp.
Q57326	Flavobacterium sp. KI723T1
Q1EPR5	Agromyces sp. KY5R
Q1EPR4	Kocuria sp. KY2
U2XM45	Microbacterium sp. TS-1
C0R138	Brachyspira hyodysenteriae (strain ATCC 49526 / WA1)
G0EJE2	Brachyspira intermedia (strain ATCC 51140 / PWS/A) (Serpulina intermedia)
A0A146TFP9	Fundulus heteroclitus (Killifish) (Mummichog)
