# Supplementary material
Source: Preprints.org preprint supplement (doi:10.20944/preprints201905.0123.v2)
Supplement: Supplementary file 7 [file supplementary_table_s6.xlsx]

## Sheet: Sheet1
	Testing the Hypothesis that the Nylonase NylB Protein
	Arose de novo via a Frameshift Mutation
	Salvador Cordova and John Sanford
	SupplementaryTable S6
	List of proteins that were listed as both a beta lactamase and a 6-aminohexanoate hydrolase nylonase
	in GenBank that were determined by searching for NylB homologs using psi-BLAST
				Accession Number as
Organism with		Accession Number		6-Aminohexanoate Hydrolase
Nylonase/Beta Lactamase		As Beta Lactamase		Nylonase			Comment
Bradyrhizobium sp. ORS 375		CCD97170.1		CCD97170.1			listed as both 6AH Nylonase and Beta Lactamase simultaneously
Candidatus Puniceispirillum marinum IMCC1322		ADE39034.1		ADE39034.1			listed as both 6AH Nylonase and Beta Lactamase simultaneously
E. Coli		SCQ13749.1		SCQ13749.1			protein listed as a Beta Lactamase, but gene listed as nylB nylonase
Delftia acidovorans		KFJ13307.1		WP_034393572.1			6AH Nylonse 100% identical with Beta Lactamase
Comamonas thiooxydans		CUA91648.1		WP_034404398.1			6AH Nylonse 100% identical with Beta Lactamase
Comamonas testosteroni		EFI60192.1		WP_034362870.1			6AH Nylonse 100% identical with Beta Lactamase
Sinorhizobium sp. RAC02		AOF94051.1		WP_069063755.1			6AH Nylonase 100% contained inside Beta Lactamase
Burkholderia singularis		SMG00640.1		WP_089340811.1			6AH Nylonase 100% contained inside Beta Lactamase
Burkholderia sp. yr281		SDJ12107.1		WP_091788686.1			6AH Nylonase 100% contained inside Beta Lactamase
Bradyrhizobium arachidis		SFV17448.1		WP_092218251.1			6AH Nylonase 100% contained inside Beta Lactamase
