# Supplementary material
Source: Preprints.org preprint supplement (doi:10.20944/preprints201905.0123.v2)
Supplement: Supplementary file 8 [file supplementary_table_s7.xlsx]

## Sheet: Sheet1
	Testing the Hypothesis that the Nylonase NylB Protein
	Arose de novo via a Frameshift Mutation
	Salvador Cordova and John Sanford
	Supplementary Table S7
	List of proteins that were listed as both an amidase and a 6-aminohexanoate hydrolase nylonase
	in GenBank that were determined by searching for NylA homologs using psi-BLAST
				Accession Number as
Organism with		Accession Number		6-Aminohexanoate Hydrolase
Nylonase		as Amidase		Nylonase			Comment
Rhodococcus erythropolis		WP_031330824.1		EQM35287.1			100% identical
Sphingomonas sp. KC8		WP_010125486.1		ARS27527.1			100% identical
Paenibacillus amylolyticus		WP_100527413.1		PJN62497.1			100% identical
Pseudomonas syringae		WP_020342474.1		EPN22118.1			100% identical
Marinobacter hydrocarbonoclasticus ATCC 49840]		WP_041654449.1		CCG93690.1			Amidase 100% contained inside 6AH Nylonase, covers 99% of 6AH Nylonase
Thiomonas delicata		WP_094159176.1		SBP86699.1			Amidase 100% contained inside 6AH Nylonase, covers 99% of 6AH Nylonase
Leptospira interrogans		WP_001136113.1		KWV26884.1			Amidase 100% contained inside 6AH Nylonase, covers 99% of 6AH Nylonase
